# Supplementary material for: Genetic Diversity of Plasmodium falciparum Populations in Malaria Declining Areas of Sabah, East Malaysia
Source: PubMed Central journal article supplement (PMC4811561; doi:10.1371/journal.pone.0152415), 2016-03-29
Supplement: pone.0152415.s002.pdf [file pone.0152415.s002.pdf]

Malaria cases in Sabah: 1782  
*P. falciparum* cases in Sabah: 973

Malaria cases in Sabah: 561  
*P. falciparum* cases in Sabah: 360

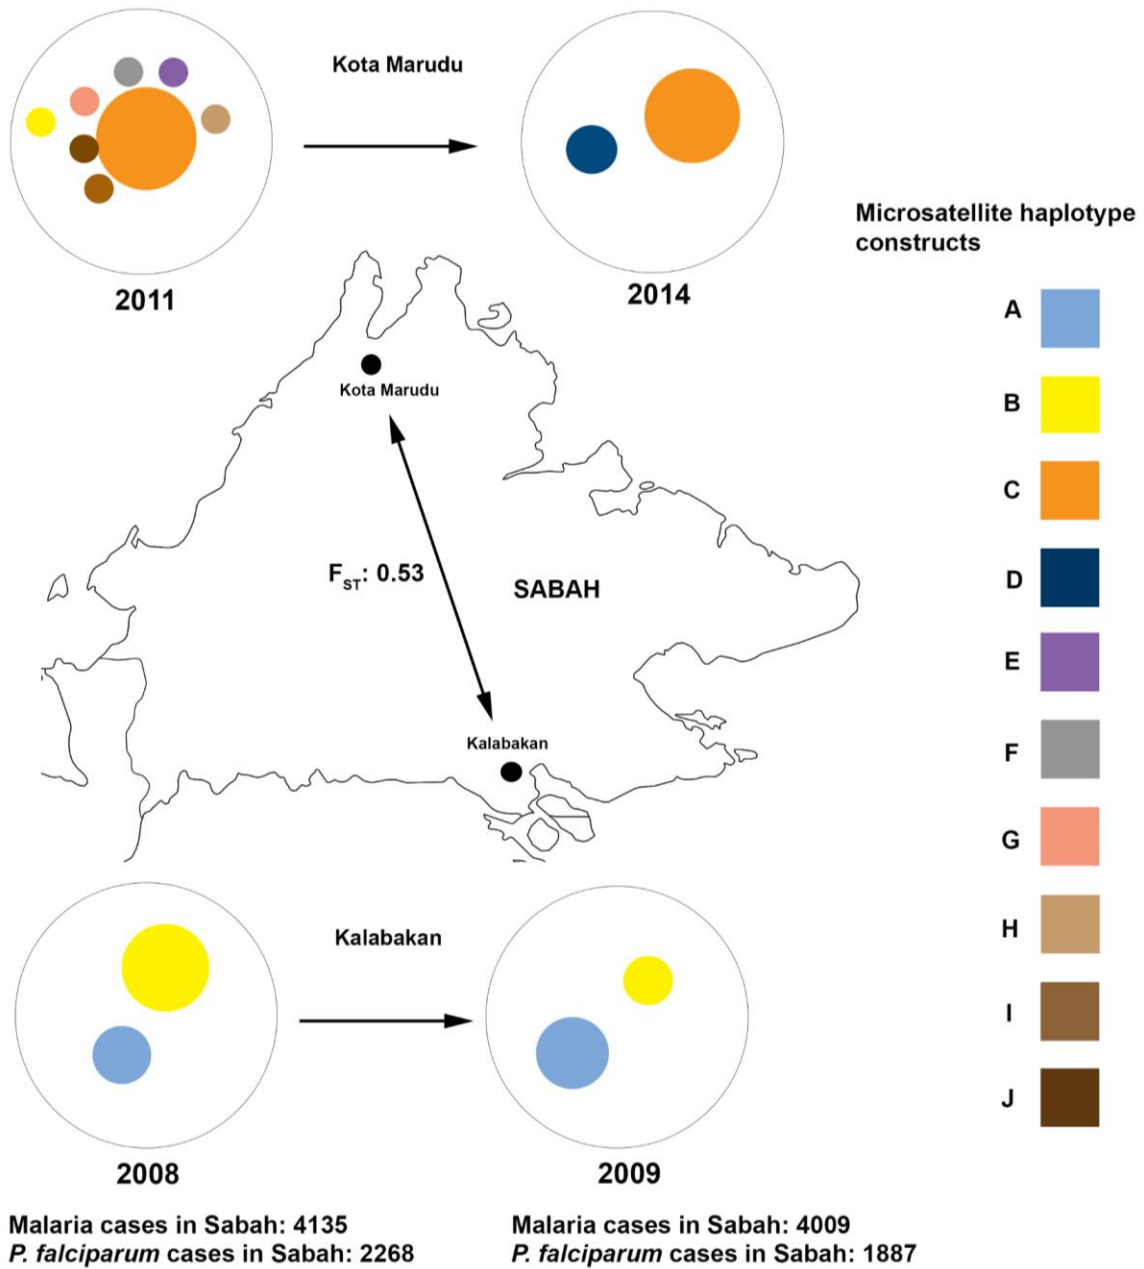

**S2 Fig. Divergence between Kalabakan and Kota Marudu *P. falciparum* population structure and the persistence of major genotypes over time based on the distribution of microsatellite haplotype constructs.**
