# Supplementary material for: Genetic Diversity of Plasmodium falciparum Populations in Malaria Declining Areas of Sabah, East Malaysia
Source: PubMed Central journal article supplement (PMC4811561; doi:10.1371/journal.pone.0152415), 2016-03-29
Supplement: pone.0152415.s003.pdf [file pone.0152415.s003.pdf]

**S1 Table. Allele frequencies of each 10 *P. falciparum* microsatellite locus.**

| Locus  | Allele | Kalabakan | Kota Marudu |
|--------|--------|-----------|-------------|
| PfPK2  | N      | 19        | 24          |
|        | 65     | 0.632     | 0.042       |
|        | 71     | 0.368     | 0.792       |
|        | 74     | 0.000     | 0.042       |
|        | 77     | 0.000     | 0.083       |
|        | 80     | 0.000     | 0.042       |
| TA42   | N      | 18        | 24          |
|        | 186    | 0.000     | 0.042       |
|        | 189    | 1.000     | 0.042       |
|        | 245    | 0.000     | 0.917       |
| TA1    | N      | 17        | 24          |
|        | 163    | 0.000     | 0.708       |
|        | 166    | 1.000     | 0.250       |
|        | 169    | 0.000     | 0.042       |
| TA81   | N      | 18        | 24          |
|        | 113    | 0.333     | 0.042       |
|        | 116    | 0.000     | 0.792       |
|        | 119    | 0.000     | 0.042       |
|        | 122    | 0.000     | 0.042       |
|        | 128    | 0.667     | 0.083       |
| ARA2   | N      | 19        | 24          |
|        | 65     | 0.632     | 0.042       |
|        | 71     | 0.368     | 0.792       |
|        | 74     | 0.000     | 0.042       |
|        | 77     | 0.000     | 0.083       |
|        | 80     | 0.000     | 0.042       |
| POLYa  | N      | 14        | 24          |
|        | 129    | 0.286     | 0.000       |
|        | 145    | 0.000     | 0.042       |
|        | 161    | 0.000     | 0.125       |
|        | 164    | 0.000     | 0.750       |
|        | 176    | 0.714     | 0.083       |
| PFG377 | N      | 18        | 24          |
|        | 96     | 1.000     | 1.000       |
| TA87   | N      | 19        | 24          |
|        | 101    | 0.684     | 0.083       |
|        | 104    | 0.316     | 0.750       |
|        | 107    | 0.000     | 0.083       |
|        | 110    | 0.000     | 0.083       |
| 2490   | N      | 18        | 24          |
|        | 82     | 0.333     | 0.917       |
|        | 85     | 0.667     | 0.083       |
| TA60   | N      | 17        | 24          |
|        | 76     | 0.000     | 0.042       |
|        | 82     | 0.647     | 0.875       |
|        | 85     | 0.353     | 0.042       |
|        | 98     | 0.000     | 0.042       |
