# Supplementary material for: Genetic Diversity of Plasmodium falciparum Populations in Malaria Declining Areas of Sabah, East Malaysia
Source: PubMed Central journal article supplement (PMC4811561; doi:10.1371/journal.pone.0152415), 2016-03-29
Supplement: pone.0152415.s004.pdf [file pone.0152415.s004.pdf]

**S2 Table. Microsatellite haplotype constructs of Kalabakan and Kota Marudu samples by year.**

| Sites       | PfPK2 | TA42 | TA1 | TA81 | ARA2 | POLYa | PFG377 | TA87 | 2490 | TA60 | Haplotype | Year of sampling |
|-------------|-------|------|-----|------|------|-------|--------|------|------|------|-----------|------------------|
| Kalabakan   | 071   | 189  | 166 | 113  | 071  | 129   | 096    | 104  | 082  | 085  | A         | 2009             |
| Kalabakan   | 065   | 189  | 166 | 128  | 065  | 176   | 096    | 101  | 085  | 082  | B         | 2009             |
| Kalabakan   | 065   | 189  | 166 | 128  | 065  | 176   | 096    | 101  | 085  | 082  | B         | 2008             |
| Kalabakan   | 065   | 189  | 166 | 128  | 065  | 176   | 096    | 101  | 085  | 082  | B         | 2008             |
| Kalabakan   | 065   | 189  | 166 | 128  | 065  | 176   | 096    | 101  | 085  | 082  | B         | 2008             |
| Kalabakan   | 065   | 189  | 166 | 128  | 065  | 176   | 096    | 101  | 085  | 082  | B         | 2008             |
| Kalabakan   | 065   | 189  | 166 | 128  | 065  | 176   | 096    | 101  | 085  | 082  | B         | 2008             |
| Kalabakan   | 065   | 189  | 166 | 128  | 065  | 176   | 096    | 101  | 085  | 082  | B         | 2008             |
| Kalabakan   | 065   | 189  | 166 | 128  | 065  | 176   | 096    | 101  | 085  | 082  | B         | 2008             |
| Kalabakan   | 071   | 189  | 166 | 113  | 071  | 129   | 096    | 104  | 082  | 085  | A         | 2008             |
| Kalabakan   | 071   | 189  | 166 | 113  | 071  | 129   | 096    | 104  | 082  | 085  | A         | 2008             |
| Kalabakan   | 065   | 189  | 166 | 128  | 065  | 176   | 096    | 101  | 085  | 082  | B         | 2008             |
| Kalabakan   | 071   | 189  | 166 | 113  | 071  | 129   | 096    | 104  | 082  | 085  | A         | 2008             |
| Kalabakan   | 065   | 189  | 166 | 128  | 065  | 176   | 096    | 101  | 085  | 082  | B         | 2008             |
| Kalabakan   | 065   | 189  | 166 | 128  | 065  | 176   | 096    | 101  | 085  | 082  | B         | 2008             |
| Kalabakan   | 071   | 189  | 166 | 113  | 071  | 129   | 096    | 104  | 082  | 085  | A         | 2009             |
| Kalabakan   | 071   | 189  | 166 | 113  | 071  | 129   | 096    | 104  | 082  | 085  | A         | 2009             |
| Kalabakan   | 071   | 189  | 166 | 113  | 071  | 129   | 096    | 104  | ND   | 085  | A         | 2009             |
| Kalabakan   | 071   | ND   | ND  | ND   | 071  | ND    | ND     | ND   | 082  | ND   |           | 2009             |
| Kalabakan   | 065   | 189  | 166 | 128  | 065  | 176   | 096    | 101  | 085  | 082  | B         | 2008             |
| Kota Marudu | 071   | 245  | 163 | 116  | 071  | 164   | 096    | 104  | 082  | 082  | C         | 2014             |
| Kota Marudu | 071   | 245  | 163 | 116  | 071  | 164   | 096    | 104  | 082  | 082  | C         | 2014             |
| Kota Marudu | 071   | 245  | 163 | 116  | 071  | 164   | 096    | 104  | 082  | 082  | C         | 2011             |
| Kota Marudu | 071   | 245  | 163 | 116  | 071  | 164   | 096    | 104  | 082  | 082  | C         | 2014             |
| Kota Marudu | 071   | 245  | 163 | 116  | 071  | 164   | 096    | 104  | 082  | 082  | C         | 2014             |
| Kota Marudu | 071   | 245  | 163 | 116  | 071  | 164   | 096    | 104  | 082  | 082  | C         | 2014             |
| Kota Marudu | 071   | 245  | 163 | 116  | 071  | 164   | 096    | 104  | 082  | 082  | C         | 2014             |
| Kota Marudu | 071   | 245  | 166 | 116  | 071  | 164   | 096    | 104  | 082  | 082  | D         | 2014             |
| Kota Marudu | 071   | 245  | 166 | 116  | 071  | 164   | 096    | 104  | 082  | 082  | D         | 2014             |
| Kota Marudu | 071   | 245  | 163 | 116  | 071  | 164   | 096    | 104  | 082  | 082  | C         | 2011             |
| Kota Marudu | 071   | 245  | 163 | 116  | 071  | 164   | 096    | 104  | 082  | 082  | C         | 2011             |
| Kota Marudu | 071   | 245  | 163 | 116  | 071  | 164   | 096    | 104  | 082  | 082  | C         | 2011             |
| Kota Marudu | 071   | 245  | 163 | 116  | 071  | 164   | 096    | 104  | 082  | 082  | C         | 2011             |
| Kota Marudu | 071   | 245  | 163 | 116  | 071  | 164   | 096    | 104  | 082  | 082  | C         | 2011             |
| Kota Marudu | 077   | 245  | 163 | 122  | 077  | 145   | 096    | 107  | 082  | 085  | E         | 2011             |
| Kota Marudu | 071   | 245  | 163 | 116  | 071  | 164   | 096    | 104  | 082  | 082  | C         | 2011             |
| Kota Marudu | 074   | 186  | 166 | 128  | 074  | 176   | 096    | 101  | 085  | 098  | F         | 2011             |
| Kota Marudu | 071   | 245  | 166 | 116  | 071  | 161   | 096    | 104  | 082  | 082  | G         | 2011             |
| Kota Marudu | 065   | 189  | 166 | 128  | 065  | 176   | 096    | 101  | 085  | 082  | B         | 2011             |
| Kota Marudu | 077   | 245  | 163 | 113  | 077  | 161   | 096    | 107  | 082  | 076  | H         | 2011             |
| Kota Marudu | 071   | 245  | 166 | 116  | 071  | 164   | 096    | 110  | 082  | 082  | I         | 2011             |
| Kota Marudu | 080   | 245  | 169 | 119  | 080  | 161   | 096    | 110  | 082  | 082  | J         | 2011             |
| Kota Marudu | 071   | 245  | 163 | 116  | 071  | 164   | 096    | 104  | 082  | 082  | C         | 2011             |
| Kota Marudu | 071   | 245  | 163 | 116  | 071  | 164   | 096    | 104  | 082  | 082  | C         | 2011             |
